# Supplementary material for: Threshold conditions for the accumulation of microbial residues in terrestrial ecosystems
Source: Research Square preprint supplement (doi:10.21203/rs.3.rs-370012/v1), 2021-04-22
Supplement: Supplementary file 1 [file 8f843e05cb6f3ab0054c1426.xlsx]

## Sheet: Sheet3
Supplementary Data: Published data on amino sugars in topsoil (0–20 cm) of forests and grasslands worldwide.
Ecosystem	Ref. IDa	Reference	Publication time	Location	Longitude (°E)	Latitude (°N)	Elevation (m)	Mean annual precipitation (MAP, mm)	Mean annual temperature (MAT, ℃)	Clay (%)	Aridity indexb (unitless)	Depth (cm)	Depth in this study(cm)	Amino sugars (mg g-1)	Data sources	pH	SOC (mg g-1)	N (mg g-1)	C/N	Note
Tropical forests	4	Ma, S. et al	2020	JFL National Nature Reserve in the southwest of Hainan Island, China	108.842	18.6083	900	2200	20	21	0.7895	0-10	0-20	2.01354	Table1	4.41	25.87	2.07	12.4976
	18	Siebers, N. et al	2015	Amazon region (Terra Firme) in Manau	-59.9833	2.98333	69	2100	25	26.7601	0.9842	0-10	0-20	0.773	Fig1	3.8	23	1.916	12.0042	Martín A, 2009
	23	Pegoraro, R. F. et al	2013	Alacruz	-40.2833	-19.8	71	1400	23	31.4	0.8951	0-10	0-20	0.294	Table4	5.1	29.54	2.29333	12.8808
	24	Pegoraro, R. F. et al	2011	Alacruz	-40.2833	-19.8	71	1400	23	31.4	0.8951	0-10	0-20	0.3741	Fig1	5.4	13.5	1.2	11.25
	24	Pegoraro, R. F. et al	2011	Alacruz	-40.2833	-19.8	71	1400	23	31.4	0.8951	0-10	0-20	0.2783	Fig1	5.4	16.8	1.1	15.2727
	25	Moritz, L. K. et al	2009	Lower eastern slope of Mt. Kinabalu in Sabah, Malaysia (Borneo) in Mt. Kinabalu National Park	116.5	6.25	650	2509	23.9	39.4333	1.387	0-15	0-20	0.899272	Table3	5.2	19.7	1.44333	13.649
	25	Moritz, L. K. et al	2009	Lower eastern slope of Mt. Kinabalu in Sabah, Malaysia (Borneo) in Mt. Kinabalu National Park	116.5	6.25	700	2509	23.7	39.4333	1.387	0-15	0-20	0.65366	Table3	5.2	23.9667	1.43667	16.6821
	30	ouml, ller, A. et al	2002	Khun Sathan, Thailand	100.35	17.48	1425	1400	25	53.3	0.8142	0-10	0-20	2.015		5.63333	60.7215	3.95539	15.3516
	30	ouml, ller, A. et al	2002	Khun Sathan, Thailand	100.35	17.48	1425	1400	25	37	0.8142	0-10	0-20	1.774		5.63333	49.4894	3.24996	15.2277
	30	ouml, ller, A. et al	2002	Khun Sathan, Thailand	100.35	17.48	1425	1400	25	40.1	0.8142	0-10	0-20	1.702		5.63333	39.7989	2.63504	15.1037
	31	Solomon, D. et al	2002	Southwestern highlands (Wushwush)	36.1167	7.31667	1900	1800	18	44.9486	1.0933	0-10	0-20	7.735	Fig5	6.4	85	7.8	10.8974
	31	Solomon, D. et al	2002	Southeastern Rift Valley escarpment (Munesa)	38.75	7.58333	1600	1250	19	31.5	0.363	0-10	0-20	7.21	Fig5	7.6	103	8.2	12.561
	31	Solomon, D. et al	2002	Southeastern Rift Valley escarpment (Munesa)	38.75	7.58333	1600	1250	19	31.5	0.363	0-10	0-20	3.834	Fig5	7.4	71	7.1	10
	33	Solomon, D. et al	2001	Naberera area of the Masai plains in the northern Tanzanian dry belt	36.6333	-3.1	1300	550	20	30.16	0.408	0-10	0-20	1.32209	Table2	6.6	18.7	1.83	10.2186
	33	Solomon, D. et al	2001	Naberera area of the Masai plains in the northern Tanzanian dry belt	36.6333	-3.1	1300	550	20	18.57	0.408	0-10	0-20	0.72588	Table2	6.9	13.8	1.22	11.3115
Subtropical forest	1	Yang, L. et al	2020	Wuyishan National Park, Fujian Province, China	117.65	27.725	630	1825	16.4	10.3	1.9148	0-15	0-20	0.905772	Fig1	4.96	37	2.3	16.087
	1	Yang, L. et al	2020	Wuyishan National Park, Fujian Province, China	117.65	27.725	1050	2561	15.2	12.6	1.9148	0-15	0-20	1.26731	Fig1	4.42	54.5	2.6	20.9615
	1	Yang, L. et al	2020	Wuyishan National Park, Fujian Province, China	117.65	27.725	1450	2675	12.4	12.6	1.9148	0-15	0-20	1.69304	Fig1	4.78	72.5	3.5	20.7143
	1	Yang, L. et al	2020	Wuyishan National Park, Fujian Province, China	117.65	27.725	1850	2942	10.7	15	1.9148	0-15	0-20	1.33582	Fig1	4.43	62.9	4.9	12.8367
	2	Chen, J. et al	2020	Mt. Dongling in northern China	115.433	39.9667	1400	500	5.4	5	0.3537	0-10	0-20	4.12546	Fig2	7.08	67.2	5.18	12.973
	2	Chen, J. et al	2020	Mt. Dongling in northern China	115.417	39.95	1250	505	5.7	6	0.3721	0-10	0-20	2.74929	Fig2	6.53	42.1	2.98	14.1275
	3	Fan, Y. et al	2020	Castanopsis kawakamii Nature Reserve, Fujian Province, Southeast China	117.467	26.1833	307.5	1700	19.4	27.7516	1.1462	0-20	0-20	0.562446	Fig1	4.085	24.4	1.75	13.9429
	6	Jing, Y. et al	2019	Baotianman Nature Reserve, Henan Province, Central China.	111.925	33.4667	1105	894	15.1	20.5333	0.7385	0-10	0-20	3.07055	Table2	5.86667	41.6	2.95333	14.0858
	7	Yang, L. et al	2019	Chenda Observation Study Site of Sanming Forest Ecosystem and Global Change Research Station in Fujian Province, China	117.615	26.3319	315	1750	19.1	44.7	1.1632	0-20	0-20	1.42844	Fig2	4.09	39.4	2.11	18.673
	7	Yang, L. et al	2019	Chenda Observation Study Site of Sanming Forest Ecosystem and Global Change Research Station in Fujian Province, China	117.615	26.3319	315	1750	19.1	47.9	1.1632	0-20	0-20	0.827578	Fig2	4.36	21.35	1.485	14.3771
	7	Yang, L. et al	2019	Chenda Observation Study Site of Sanming Forest Ecosystem and Global Change Research Station in Fujian Province, China	117.615	26.3319	301	1750	19.1	47.9	1.1632	0-20	0-20	0.618999	Fig2	4.43	14.65	0.94	15.5851
	7	Yang, L. et al	2019	Chenda Observation Study Site of Sanming Forest Ecosystem and Global Change Research Station in Fujian Province, China	117.615	26.3319	303	1750	19.1	46.35	1.1632	0-20	0-20	0.724132	Fig2	4.435	16.3	1.075	15.1628
	10	Ma, Z. et al	2018	Shixi Forest Plantation, Jiangxi Province, southern China	115.07	26.7478	100	1471.2	17.9	29.2	1.192	0-10	0-20	0.159774	Fig1	4.7	17.1	1.2	14.25
	13	Shao, S. et al	2017	Dinghushan Biosphere Reserve, China	112.34	23.11	125	1956	21	20.3474	1.3793	0-20	0-20	0.726341	Table2	4.1	14.5	1.1	13.1818
	13	Shao, S. et al	2017	Dinghushan Biosphere Reserve, China	112.33	23.11	125	1956	21	20.6602	1.4002	0-20	0-20	1.19637	Table2	4.1	17.5	1.35	12.963
	13	Shao, S. et al	2017	Dinghushan Biosphere Reserve, China	112.33	23.11	125	1956	21	20.6602	1.4002	0-20	0-20	1.68859	Table2	4.1	27.15	2.25	12.0667
	15	Ding, X. et al	2017	Western slope of Sierra Nevada in California	-119.567	37.7167	1200	1030	13.6	26.8	0.4985	6-18.7	0-20	0.783859	Table1	5.7	80.8314	2.24	36.0854
	15	Ding, X. et al	2017	Western slope of Sierra Nevada in California	-119.567	37.7167	1800	1150	9.1	6.3	0.4985	6-18.7	0-20	0.501168	Table1	5.7	29.0153	2.24	12.9533
	15	Ding, X. et al	2017	Western slope of Sierra Nevada in California	-119.567	37.7167	2350	1350	6.7	6.7	0.4985	6-18.7	0-20	0.702562	Table1	5.7	41.1323	2.24	18.3626
	15	Ding, X. et al	2017	Western slope of Sierra Nevada in California	-119.567	37.7167	1200	1030	13.6	14	0.4985	6-18.7	0-20	1.10535	Table1	5.7	52.1887	2.24	23.2985
	15	Ding, X. et al	2017	Western slope of Sierra Nevada in California	-119.567	37.7167	1800	1150	9.1	7.7	0.4985	6-18.7	0-20	0.569531	Table1	5.7	35.8289	2.24	15.995
	15	Ding, X. et al	2017	Western slope of Sierra Nevada in California	-119.567	37.7167	2350	1350	6.7	8.7	0.4985	6-18.7	0-20	0.508882	Table1	5.7	24.4438	2.24	10.9124
	15	Ding, X. et al	2017	Western slope of Sierra Nevada in California	-119.567	37.7167	1200	1030	13.6	25.4	0.4985	6-18.7	0-20	1.5765	Table1	5.7	119.596	2.24	53.3911
	15	Ding, X. et al	2017	Western slope of Sierra Nevada in California	-119.567	37.7167	1800	1150	9.1	9.4	0.4985	6-18.7	0-20	1.72431	Table1	5.7	88.3301	2.24	39.4331
	15	Ding, X. et al	2017	Western slope of Sierra Nevada in California	-119.567	37.7167	2350	1350	6.7	7.7	0.4985	6-18.7	0-20	0.992644	Table1	5.7	65.3556	2.24	29.1766
	16	Zhang, W. et al	2016	Dinghushan Biosphere Reserve, Guangdong Province, southern China	112.167	23.1667	125	1927	21	29.3	1.3076	0-10	0-20	1.97203	Table1	3.91	37.77	2.54	14.8701
	36	Wang, Q.	2019	Chenda Observation Study Site of Sanming Forest Ecosystem and Global Change Research Station in Fujian Province, China	117.6	26.3167	330	1749	19.1	44.705	1.1955	0-20	0-20	1.65636	Fig3	4.09	34.4	2.11	16.3033
	36	Wang, Q.	2019	Chenda Observation Study Site of Sanming Forest Ecosystem and Global Change Research Station in Fujian Province, China	117.6	26.3167	330	1749	19.1	47.89	1.1955	0-20	0-20	0.843202	Fig3	4.36	21.35	1.485	14.3771
	36	Wang, Q.	2019	Chenda Observation Study Site of Sanming Forest Ecosystem and Global Change Research Station in Fujian Province, China	117.6	26.3167	330	1749	19.1	47.89	1.1955	0-20	0-20	0.661261	Fig3	4.35	14.55	1.04	13.9904
	36	Wang, Q.	2019	Chenda Observation Study Site of Sanming Forest Ecosystem and Global Change Research Station in Fujian Province, China	117.6	26.3167	330	1749	19.1	46.93	1.1955	0-20	0-20	0.736321	Fig3	4.43	14.65	0.94	15.5851
	36	Wang, Q.	2019	Chenda Observation Study Site of Sanming Forest Ecosystem and Global Change Research Station in Fujian Province, China	117.6	26.3167	330	1749	19.1	46.31	1.1955	0-20	0-20	0.645088	Fig3	4.435	16.3	1.075	15.1628
	37	Cui, Y. et al	2016	Dinghushan Biosphere Reserve, China	112.55	23.1667	125	1927	21	25.1667	1.3628	0-10	0-20	1.96527	Fig1	3.92	42.5	3.05	13.9344
	38	Wang, X. et al	2016	Dinghushan Biosphere Reserve, China	112.536	23.1737	125	1927	21	20.8333	1.4059	0-20	0-20	1.4258	Fig2	3.77	27.67	1.45	19.0828
	38	Wang, X. et al	2016	Dinghushan Biosphere Reserve, China	112.536	23.1737	325	1927	21	20.8333	1.4059	0-20	0-20	1.65911	Fig2	3.55	33.57	2.25	14.92
	39	Yu, N.	2013	Dinghushan Biosphere Reserve, China	112.536	23.1737	125	1927	21	20.8333	1.4059	0-15	0-20	0.849776	Fig3.3	3.92	15.98	1.26767	12.6058
	39	Yu, N.	2013	Dinghushan Biosphere Reserve, China	112.536	23.1737	175	1927	21	20.8333	1.4059	0-15	0-20	1.19506	Fig3.3	3.92	19.455	1.35533	14.3544
	39	Yu, N.	2013	Dinghushan Biosphere Reserve, China	112.536	23.1737	175	1927	21	20.8333	1.4059	0-15	0-20	1.3499	Fig3.3	3.92	21.8793	1.53367	14.266
	39	Yu, N.	2013	Dinghushan Biosphere Reserve, China	112.536	23.1737	175	1927	21	20.8333	1.4059	0-15	0-20	1.44921	Fig3.3	3.92	23.2217	1.625	14.2903
	39	Yu, N.	2013	Dinghushan Biosphere Reserve, China	112.536	23.1737	325	1927	21	20.8333	1.4059	0-15	0-20	1.939	Fig3.3	3.92	30.2117	2.452	12.3212
	40	Li, Y.	2019	Chenda Observation Study Site of Sanming Forest Ecosystem and Global Change Research Station in Fujian Province, China	117.6	26.3167	300	1749	19.1	47.1	1.1955	0-20	0-20	0.622167	Fig5.1	4.5	11.05	0.95	11.6316
Temperate forest	5	Huang, Y. et al	2019	Northwest Guangxi Zhuang Autonomous Region, southwest China	107.983	25.15	124	1422	19.45	26.6	1.226	0-10	0-20	3.55387	Fig1	7.33	61.52	3.84	16.0208
	8	Shao, P. et al	2019	Changbai Mountain National Nature Reserve in Jilin Province, northeast China	128.008	42.3667	850	700	2.9	20.0667	0.7704	0-15	0-20	7.73271	Fig3	5.75	139.09	7.49	18.5701
	8	Shao, P. et al	2019	Changbai Mountain National Nature Reserve in Jilin Province, northeast China	128.008	42.3667	850	700	2.9	20.0667	0.7704	0-15	0-20	9.9077	Fig3	5.66	167.01	10.06	16.6014
	8	Shao, P. et al	2019	Changbai Mountain National Nature Reserve in Jilin Province, northeast China	128.008	42.3667	850	700	2.9	20.0667	0.7704	0-15	0-20	11.2127	Fig3	5.5	189.75	11.01	17.2343
	8	Shao, P. et al	2019	Changbai Mountain National Nature Reserve in Jilin Province, northeast China	128.008	42.3667	850	700	2.9	20.0667	0.7704	0-15	0-20	11.1371	Fig3	5.61	190.39	10.61	17.9444
	8	Shao, P. et al	2019	Changbai Mountain National Nature Reserve in Jilin Province, northeast China	128.008	42.3667	850	700	2.9	20.0667	0.7704	0-15	0-20	9.99314	Fig3	6.06	176.01	9.91	17.7608
	9	Murugan, R. et al	2019	Central Austrian Alps on Mt. Sonnblick, north of Innsbruck, Austria	12.9733	47.065	1600	1480	3.8	8.5	2.2265	0-15	0-20	5.80006	Table3	4.3	97	7.02	13.8177
	9	Murugan, R. et al	2019	Central Austrian Alps on Mt. Sonnblick, north of Innsbruck, Austria	12.9733	47.065	1300	1067	5.9	6	2.2265	0-15	0-20	5.25564	Table3	4.5	93	7.02	13.2479
	11	Angst, G. et al	2018	Göttingen in central Germany	9.69007	51.4405	270	650	9.2	7.7	0.9951	0-10	0-20	2.50938	Table1	3.95	54.4333	3.52667	15.4348
	11	Angst, G. et al	2018	Göttingen in central Germany	10.2453	51.581	200	650	9.2	9.3	0.8987	0-10	0-20	3.8285	Table1	3.85	49.4	2.95667	16.708
	11	Angst, G. et al	2018	Göttingen in central Germany	9.75902	51.4766	470	650	9.2	11.5	1.1989	0-10	0-20	3.0051	Table1	4.25	74.2	4.31	17.2158
	12	Sun, H. et al	2018	Scheyern Research Farm (TERENO site) located 40 km north of Munich, Germany	11.45	48.5	472.5	80.3	7.4	19	0.9798	0-10	0-20	1.0019	Table4	6.2	11.3	4.02	2.81095	Appuhn et al. (2004)
	14	Bai, Z. et al	2017	CBMNR	128.083	42.3833	802	700	2.8	17.2778	0.7404	0-15	0-20	0.308707	Table2	5.01667	5.99333	0.346667	17.2885
	14	Bai, Z. et al	2017	CBMNR	128.083	42.3833	802	700	2.8	17.2778	0.7404	0-15	0-20	0.304092	Table2	5.27	5.52667	0.366667	15.0727
	14	Bai, Z. et al	2017	CBMNR	128.083	42.3833	802	700	2.8	17.2778	0.7404	0-15	0-20	0.262805	Table2	5.14667	4.77667	0.32	14.9271
	14	Bai, Z. et al	2017	CBMNR	128.083	42.3833	802	700	2.8	17.2778	0.7404	0-15	0-20	0.243982	Table2	5.27333	4.14667	0.296667	13.9775
	14	Bai, Z. et al	2017	CBMNR	128.083	42.3833	802	700	2.8	17.2778	0.7404	0-15	0-20	0.227695	Table2	5.33333	3.76667	0.273333	13.7805
	17	Khan, K. S. et al	2016	Göttingen, Germany	9.5608	51.3202	470	650	9.2	55.3	0.8327	0-10	0-20	2.1036	Supplementary Tables 1–6	3.88	58	2.37	24.4726
	17	Khan, K. S. et al	2016	Dransfeld, Germany	9.46	51.3	470	650	9.2	74.9	0.8024	0-10	0-20	0.8918	Supplementary Tables 1–6	4.02	27	1.1	24.5455
	17	Khan, K. S. et al	2016	Dransfeld, Germany	9.46	51.3	470	650	9.2	60	0.8024	0-10	0-20	1.1803	Supplementary Tables 1–6	3.92	48.3	1.89	25.5556
	17	Khan, K. S. et al	2016	Dransfeld, Germany	9.46	51.3	470	650	9.2	7.5	0.8024	0-10	0-20	1.5608	Supplementary Tables 1–6	3.93	59.9	4.25	14.0941
	17	Khan, K. S. et al	2016	Dransfeld, Germany	9.46	51.3	470	650	9.2	83.9	0.8024	0-10	0-20	2.2267	Supplementary Tables 1–6	3.9	41.6	1.78	23.3708
	17	Khan, K. S. et al	2016	Göttingen, Germany	9.5608	51.3202	470	650	9.2	90.6	0.8327	0-10	0-20	1.7574	Supplementary Tables 1–6	3.79	35.3	0.95	37.1579
	17	Khan, K. S. et al	2016	Witzenhausen, Germany	9.5128	51.2032	278	810.26	9.2	4.4	0.8601	0-10	0-20	3.2264	Supplementary Tables 1–6	3.51	128.3	5.19	24.7206
	17	Khan, K. S. et al	2016	Göttingen, Germany	9.5608	51.3202	470	650	9.2	15.4	0.8327	0-10	0-20	0.7504	Supplementary Tables 1–6	4.74	19.8	0.98	20.2041
	17	Khan, K. S. et al	2016	Göttingen, Germany	9.5608	51.3202	470	650	9.2	7	0.8327	0-10	0-20	3.6952	Supplementary Tables 1–6	7.72	90.8	5.29	17.1645
	17	Khan, K. S. et al	2016	Göttingen, Germany	9.5608	51.3202	470	650	9.2	5.8	0.8327	0-10	0-20	3.7838	Supplementary Tables 1–6	7.12	145.9	13.93	10.4738
	17	Khan, K. S. et al	2016	Göttingen, Germany	9.5608	51.3202	470	650	9.2	48.6	0.8327	0-10	0-20	2.2961	Supplementary Tables 1–6	5.9	46.4	2.49	18.6345
	17	Khan, K. S. et al	2016	Göttingen, Germany	9.5608	51.3202	470	650	9.2	12.8	0.8327	0-10	0-20	1.6294	Supplementary Tables 1–6	6.54	27	1.66	16.2651
	17	Khan, K. S. et al	2016	Göttingen, Germany	9.5608	51.3202	470	650	9.2	9.9	0.8327	0-10	0-20	1.5063	Supplementary Tables 1–6	4.55	51.9	2.48	20.9274
	19	Hatton, P.-J. et al	2014	Ebrach, Germany	10.45	49.8667	570	750	7.9	14	0.9361	0-5	0-20	1.1204	Table1	3.9	45.9	2	22.95	Bodé et al. (2009)
	20	Freppaz, M. et al	2014	Ligurian mid-alpine area (Ormea, NW Italy, ∼30 km North from the Mediterranean sea)	7.55	44.09	1609	1282	9.05	20	1.0467	0-10	0-20	1.21128	Fig3	6.06667	80.43	4.85333	16.5721
	20	Freppaz, M. et al	2014	Ligurian mid-alpine area (Ormea, NW Italy, ∼30 km North from the Mediterranean sea)	7.55	44.09	1609	1282	-10.01	20	1.0467	0-10	0-20	1.67697	Fig3	6.06667	80.43	4.85333	16.5721
	20	Freppaz, M. et al	2014	Ligurian mid-alpine area (Ormea, NW Italy, ∼30 km North from the Mediterranean sea)	7.55	44.09	1609	1282	-7.31	20	1.0467	0-10	0-20	1.36731	Fig3	6.06667	80.43	4.85333	16.5721
	20	Freppaz, M. et al	2014	Ligurian mid-alpine area (Ormea, NW Italy, ∼30 km North from the Mediterranean sea)	7.55	44.09	1609	1282	2.16	20	1.0467	0-10	0-20	0.70135	Fig3	6.06667	80.43	4.85333	16.5721
	20	Freppaz, M. et al	2014	Ligurian mid-alpine area (Ormea, NW Italy, ∼30 km North from the Mediterranean sea)	7.55	44.09	1312	1282	9.05	20	1.0467	0-10	0-20	1.01905	Fig3	6.06667	80.43	4.85333	16.5721
	20	Freppaz, M. et al	2014	Ligurian mid-alpine area (Ormea, NW Italy, ∼30 km North from the Mediterranean sea)	7.55	44.09	1312	1282	-10.01	20	1.0467	0-10	0-20	1.28929	Fig3	6.06667	80.43	4.85333	16.5721
	20	Freppaz, M. et al	2014	Ligurian mid-alpine area (Ormea, NW Italy, ∼30 km North from the Mediterranean sea)	7.55	44.09	1312	1282	-7.31	20	1.0467	0-10	0-20	1.34801	Fig3	6.06667	80.43	4.85333	16.5721
	20	Freppaz, M. et al	2014	Ligurian mid-alpine area (Ormea, NW Italy, ∼30 km North from the Mediterranean sea)	7.55	44.09	1312	1282	2.16	20	1.0467	0-10	0-20	1.08259	Fig3	6.06667	80.43	4.85333	16.5721
	20	Freppaz, M. et al	2014	Ligurian mid-alpine area (Ormea, NW Italy, ∼30 km North from the Mediterranean sea)	7.55	44.09	1321	1282	9.05	20	1.0467	0-10	0-20	1.02387	Fig3	6.06667	80.43	4.85333	16.5721
	20	Freppaz, M. et al	2014	Ligurian mid-alpine area (Ormea, NW Italy, ∼30 km North from the Mediterranean sea)	7.55	44.09	1321	1282	-10.01	20	1.0467	0-10	0-20	1.33273	Fig3	6.06667	80.43	4.85333	16.5721
	20	Freppaz, M. et al	2014	Ligurian mid-alpine area (Ormea, NW Italy, ∼30 km North from the Mediterranean sea)	7.55	44.09	1321	1282	-7.31	20	1.0467	0-10	0-20	0.8043	Fig3	6.06667	80.43	4.85333	16.5721
	20	Freppaz, M. et al	2014	Ligurian mid-alpine area (Ormea, NW Italy, ∼30 km North from the Mediterranean sea)	7.55	44.09	1321	1282	2.16	20	1.0467	0-10	0-20	0.936205	Fig3	6.06667	80.43	4.85333	16.5721
	21	Zhang, B. et al	2013	Northern slope of Changbai Mountain in Jilin Province, northeastern China	128.083	42.3833	807	691	2.58	17.2778	0.7404	0-20	0-20	10.068	Fig4	5.1	171	11.5	14.8696
	21	Zhang, B. et al	2013	Northern slope of Changbai Mountain in Jilin Province, northeastern China	128.15	42.15	1204	811	0.27	28.0849	0.8536	0-20	0-20	3.14637	Fig4	4.57	59.6	3.1	19.2258
	21	Zhang, B. et al	2013	Northern slope of Changbai Mountain in Jilin Province, northeastern China	128.067	41.0667	1707	967	-2.29	18.4	1.1851	0-20	0-20	3.78952	Fig4	3.95	96.5	4.55	21.2088
	21	Zhang, B. et al	2013	Northern slope of Changbai Mountain in Jilin Province, northeastern China	128.067	41.05	1974	1038	-3.31	21.7477	1.0012	0-20	0-20	3.78952	Fig4	4.59	65.4	4.25	15.3882
	22	Klotzbücher, T. et al	2013	Bavaria, Germany	10.45	49.8667	430	750	7.5	28.5247	0.9361	0-10	0-20	1.463	Fig2	5.53333	18.3	3.56	5.14045
	26	Liang, C. et al	2008	Sylvania Wilderness Recreational Area, Ottawa National Forest in Western Upper Peninsula of Michigan, USA	-90.0833	46.4667	422	878	4.25	15.3667	0.9598	0-15	0-20	0.9401	Fig1	4.36	31.03	2.31	13.4329
	26	Liang, C. et al	2008	Sylvania Wilderness Recreational Area, Ottawa National Forest in Western Upper Peninsula of Michigan, USA	-90.0833	46.4667	422	878	4.25	15.3667	0.9598	0-15	0-20	0.82174	Fig1	4.74	27.96	1.89	14.7937
	26	Liang, C. et al	2008	Sylvania Wilderness Recreational Area, Ottawa National Forest in Western Upper Peninsula of Michigan, USA	-90.0833	46.4667	422	878	4.25	15.3667	0.9598	0-15	0-20	0.66491	Fig1	3.73	29.14	1.75	16.6514
	27	Van Groenigen, K.-J. et al	2007	Rhinelander (WI) USA	-88.1342	40.0638	209	793	4.7	28	0.8364	0-20	0-20	0.889485	Fig1	6.2	29.6	2.81333	10.5213
	28	Jolivet, C. et al	2006	Landes de Gascogne	-0.783333	44.4833	80	900	12.7	6.9	0.8559	0-25	0-20	0.6916	Table5	4.3	33.5	1.155	29.0043	Chantigny et al. (1997)
	28	Jolivet, C. et al	2006	Landes de Gascogne	-0.783333	44.4833	80	900	12.7	5.7	0.8559	0-25	0-20	0.5011	Table5	4.5	29.6	1.184	25	Chantigny et al. (1997)
	29	Turrión, M.-B. et al	2002	Sui Checti Valley in the Alay Range, Kyrgyzia	72.65	40.0333	2900	900	-0.1	15.5	0.548	0-10	0-20	8.9532	Table2	7	130.8	8.6	15.2093
	32	Kaiser, K. et al	2001	Flat hilltops in NE-Bavaria, Germany	11.6833	49.8833	490	589	8.3	28.2912	0.9778	0-4	0-20	4.6	Table7	6.23	377	13	29
	32	Kaiser, K. et al	2001	Flat hilltops in NE-Bavaria, Germany	11.3833	49.7333	520	956	8.2	27.3756	1.2036	0-5	0-20	3.3	Table7	5.47	481	16	30.0625
	34	Zhang, X. et al	1999	Lincoln, NE, USA	-96.6667	40.8	386	792	10.9	33.6333	0.0347	0-10	0-20	1.61561	Table2	6.36667	44.78	3.79	11.8153
	35	Zhang, X. & Amelung, W.	1996	Bayreuth, Germany	11.3442	49.5653	355	590	12	28.6667	1.0116	0-5	0-20	1.313	Table3	6.63333	70	2	35
	41	Xie, H. et al	2008	Southeast of Jilin Province, peaking	128.1	42.4	600	708	2.6	24.36	0.7411	0-13	0-20	6.118	Table3	4.08	58.67	5.61	10.4581
	41	Xie, H. et al	2008	Southeast of Jilin Province, peaking	128.067	42.0833	1680	1031	-2.9	14.25	1.0288	0-10	0-20	4.0526	Table3	3.79	46.38	3.94	11.7716
	41	Xie, H. et al	2008	Southeast of Jilin Province, peaking	128.1	42.0167	2580	1321	-7.7	18.4333	1.3852	0-12	0-20	1.08693	Table3	4.23	48.8133	2.84667	17.1475
	42	Jin, LY	2018	Experimental forest farm of Liaoning Forest Management Research Institute	124.672	41.1889	415	926.3	6.1	15.3435	0.9235	0-10	0-20	0.720238	Fig1	5.46	18.77	1.03	18.2233
	42	Jin, L. et al	2018	Experimental forest farm of Liaoning Forest Management Research Institute	124.672	41.1889	415	926.3	6.1	15.3435	0.9235	0-10	0-20	1.85745	Fig1	5.06	27.39	2.32	11.806
	42	Jin, L. et al	2018	Experimental forest farm of Liaoning Forest Management Research Institute	124.672	41.1889	415	926.3	6.1	15.3435	0.9235	0-10	0-20	1.96989	Fig1	4.64	26.88	2.3	11.687
Tropical grassland	24	Pegoraro, R. F. et al	2011	Alacruz	-40.2833	-19.8	66	1400	23	22	0.898	0-10	0-20	0.4313	Fig1	5.7	12	1.2	10
Subtropical grassland	44	Jia, B. et al.	2020	Maqu county, Gannan autonomous prefecture, Gansu province, China	102.017	33.4833	3486	505	2	21.9596	0.7136	0-20	0-20	8.449	Fig3	6.07	119	7.2	16.5278
	44	Jia, B. et al.	2020	Maqu county, Gannan autonomous prefecture, Gansu province, China	101.867	33.6667	3531	627	2.2	20.7333	0.7097	0-20	0-20	6.059	Fig3	6.23	73	4.9	14.898
	45	Ding, X. et al.	2020	Beiluhe Observation and Research Station of Chinese Academy of Sciences on the QTP	92.9333	34.85	4671	383	-3.8	18.4603	0.29	0-20	0-20	1.33999	Table2	8.765	22.5	1.57	14.3312
	45	Ding, X. et al.	2020	Beiluhe Observation and Research Station of Chinese Academy of Sciences on the QTP	92.9333	34.85	4671	383	-3.8	18.4603	0.29	0-20	0-20	0.213634	Table2	8.575	4.46	0.37	12.0541
	46	Luo, R. et al.	2020	Haibei Alpine Grassland Ecosystem Research Station in the northeastern Tibetan Plateau, Qinghai Province, China	101.2	37.6167	3220	489	-1.2	17.7667	0.4555	0-10	0-20	5.296	Table2	7.21	66.7	6.75	9.88148
	48	Ding, X. et al.	2019	Beiluhe Observation and Research Station of Chinese Academy of Sciences on the QTP	92.9333	34.85	4671	383	-3.8	18.4603	0.2876	0-20	0-20	0.53535	Table2	8.745	15	1.205	12.4481
	50	Ma, T. et al.	2018	Central part of the Eurasian steppe	101.62	39.02	1470	120	7.7	59	0.1092	0-10	0-20	0.337134	Supplementary Data 1	8.66	4.83	0.59	8.18644
	50	Ma, T. et al.	2018	Central part of the Eurasian steppe	101.77	38.94	1490	19.4	7.8	42	0.1129	0-10	0-20	0.039355	Supplementary Data 1	8.85	0.85	0.07	12.1429
	50	Ma, T. et al.	2018	Central part of the Eurasian steppe	101.88	38.91	1440	122	7.8	30	0.1105	0-10	0-20	0.049022	Supplementary Data 1	8.87	1.27	0.15	8.46667
	50	Ma, T. et al.	2018	Central part of the Eurasian steppe	104.71	39.65	1268	104	8.1	57	0.0951	0-10	0-20	0.041998	Supplementary Data 1	8.86	1.66	0.23	7.21739
	51	Guan, Z.-H. et al.	2018	Gannan Tibetan Autonomous Prefecture, Gansu Province	102.875	34.9033	3009	545	1.7	19	0.5841	0-20	0-20	3.13856	Fig5	7.6	45.5	3.2	14.2188
	51	Guan, Z.-H. et al.	2018	Gannan Tibetan Autonomous Prefecture, Gansu Province	102.868	36.1063	2745	545	1.7	13	0.3616	0-20	0-20	3.70197	Fig5	8.39	33.3	3.1	10.7419
	51	Guan, Z.-H. et al.	2018	Gannan Tibetan Autonomous Prefecture, Gansu Province	102.89	36.0915	2761	545	1.7	9	0.3763	0-20	0-20	3.37399	Fig5	8.42	21.9	2.1	10.4286
	51	Guan, Z.-H. et al.	2018	Gannan Tibetan Autonomous Prefecture, Gansu Province	102.845	34.84	2986	545	1.7	15	0.5871	0-20	0-20	3.71742	Fig5	7.23	35.7	2.5	14.28
	51	Guan, Z.-H. et al.	2018	Gannan Tibetan Autonomous Prefecture, Gansu Province	102.875	34.9033	3009	545	1.7	18	0.5841	0-20	0-20	2.84042	Fig5	6.76	53.1	3.6	14.75
	51	Guan, Z.-H. et al.	2018	Gannan Tibetan Autonomous Prefecture, Gansu Province	102.822	34.875	3042	545	1.7	17	0.5778	0-20	0-20	2.44366	Fig5	7.44	52.1	3.7	14.0811
	51	Guan, Z.-H. et al.	2018	Gannan Tibetan Autonomous Prefecture, Gansu Province	102.853	34.8983	3114	545	1.7	19	0.5917	0-20	0-20	2.55408	Fig5	6.86	38.8	2.8	13.8571
	51	Guan, Z.-H. et al.	2018	Gannan Tibetan Autonomous Prefecture, Gansu Province	102.87	34.9017	3118	545	1.7	19	0.5802	0-20	0-20	2.99319	Fig5	6.76	53.2	3.6	14.7778
	53	Jia, J. et al.	2017	Haibei Alpine Grassland Ecosystem Research Station in the northeastern Tibetan Plateau, Qinghai Province, China	101.317	37.6	3215	489	-1.2	58.4	0.487	0-10	0-20	4.78	Fig5	8.01	70.9	5.7	12.4386
	55	Liang, C. et al.	2015	Eastern foothills of the Santa Cruz Mountains at the Jasper Ridge Biological Preserve in the San Francisco Bay area	-122.23	37.4	136.55	652	17.5	30.3462	0.5334	0-15	0-20	0.62908	Fig2	6.75	9.23	2.64	3.49621
	58	Lauer, F. et al.	2011	Harrismith in the Free State Province of South Africa	29.1039	-28.2733	1626	656	13.9	20.3	0.4149	0-10	0-20	2.37495	Table1	5.3	22.1	1.5	14.7333
	58	Lauer, F. et al.	2011	Kroonstad in the Free State Province of South Africa	27.2342	-27.6358	1417	656	14.8	19.3	0.2942	0-10	0-20	1.78552	Table1	6.2	14.6	1.1	13.2727
	58	Lauer, F. et al.	2011	Tweespruit in the Free State Province of South Africa	27.0283	-29.1883	1587	544	16.6	18.3	0.3343	0-10	0-20	2.38532	Table1	5.5	17.6	1.4	12.5714
	61	Amelung, W. et al	2001	Missouri, USA	-92.33	38.95	221	990	12	21.3	0.7473	0-5	0-20	3.54	Table1	4.4	43.2	3.87	11.1628
	61	Amelung, W. et al	2001	Missouri, USA	-92.33	38.95	221	990	12	21.1	0.7473	0-5	0-20	0.65	Table1	6.8	19.5	1.89	10.3175
	61	Amelung, W. et al	2001	Texas, USA	-97.44	30.16	119	500	14	28	0.494	0-5	0-20	2.46	Table1	6.3	39.3	4.03	9.75186
	61	Amelung, W. et al	2001	Texas, USA	-97.44	30.16	119	500	14	28.4	0.494	0-5	0-20	0.84	Table1	6.1	12.5	1.43	8.74126
	61	Amelung, W. et al	2001	Oklahoma, USA	-97.26	35.12	380	1030	16	9.5	0.5521	0-5	0-20	1	Table1	5.6	13.9	1.4	9.92857
	61	Amelung, W. et al	2001	Oklahoma, USA	-97.26	35.12	380	1030	16	6.3	0.5521	0-5	0-20	0.47	Table1	5	7.3	0.79	9.24051
	61	Amelung, W. et al	2001	Oklahoma, USA	-97.26	35.12	380	850	16	15.8	0.5521	0-5	0-20	1	Table1	7.4	10.7	1.26	8.49206
	61	Amelung, W. et al	2001	Oklahoma, USA	-97.26	35.12	380	850	16	14.9	0.5521	0-5	0-20	0.57	Table1	6.3	9.3	0.81	11.4815
	62	Amelung, W. et al	1999	Armo, North American	-99.3167	38.8667	734	573	12.2	27.5	0.3363	0-10	0-20	3.28075	Table1	7.1	27.5	2.68	10.2612
	62	Amelung, W. et al	1999	Reading, North American	-96.5667	39.1833	356	791	12.4	33.2	0.5855	0-10	0-20	3.4077	Table1	6	30.7	2.86	10.7343
	62	Amelung, W. et al	1999	Parsons, North American	-95.25	37.3333	310	1000	14.2	18.2	0.6709	0-10	0-20	3.20528	Table1	4.9	26.8	2.46	10.8943
	62	Amelung, W. et al	1999	Amarillo, North American	-103.36	33.3	1244	466	17.1	20.9	0.1775	0-10	0-20	0.90061	Table1	7.4	11.3	1.16	9.74138
	62	Amelung, W. et al	1999	Halettsville, North American	-98.47	32.82	337	1030	20	25.1	0.3906	0-10	0-20	1.77513	Table1	7.4	23.7	1.92	12.3438
	62	Amelung, W. et al	1999	Morey, North American	-94.59	31.72	133	1308	20.3	25.8	0.7543	0-10	0-20	2.24523	Table1	5.9	24.7	2.15	11.4884
	62	Amelung, W. et al	1999	Racombes, North American	-97.05	30.19	166	700	22.2	25.9	0.5338	0-10	0-20	1.61325	Table1	7.6	22.5	1.75	12.8571
	62	Amelung, W. et al	1999	Moglia, North American	-101.49	30.52	633	440	23.4	28.4	0.1945	0-10	0-20	1.064	Table1	7.6	16	1.4	11.4286
	64	Zhang R	2015	Artificial grassland in military Ranch	100.563	34.4311	3996	508.8	-3.75	19.1667	0.6334	0-20	0-20	2.42097	Table5.5	7.37	34.095	2.535	13.4497
	64	Zhang R	2015	Black soil beach of military Ranch	100.728	34.3794	3997	508.8	-3.75	17.8123	0.666	0-20	0-20	2.25896	Table5.5	7.04	26.935	1.69	15.9379
	64	Zhang R	2015	Natural grassland of military Ranch	100.591	34.3794	3943	508.8	-3.75	14.5	0.8284	0-20	0-20	1.56835	Table5.5	6.885	26.03	1.905	13.664
	64	Zhang R	2015	Artificial grassland in Wosai Township	99.9272	33.6853	4070	508.8	-3.75	20.6667	0.6035	0-20	0-20	1.35293	Table5.5	6.28	18.545	1.475	12.5729
	64	Zhang R	2015	Heitutan, Wosai Township	99.9317	33.6928	4078	508.8	-3.75	19.8868	0.5848	0-20	0-20	1.88297	Table5.5	6.175	22.9	1.725	13.2754
	64	Zhang R	2015	Natural grassland in Wosai Township	99.9517	33.6853	4082	508.8	-3.75	19.8667	0.5991	0-20	0-20	3.0756	Table5.5	5.975	38.725	2.65	14.6132
	64	Zhang R	2015	Artificial grassland in Qingzhen Township	100.16	34.3567	4169	508.8	-3.75	18.5667	0.6253	0-20	0-20	2.21561	Table5.5	7.09	34.35	2.52	13.631
	64	Zhang R	2015	Heitutan, Qingzhen Township	100.287	34.2447	4152	508.8	-3.75	18.1	0.7357	0-20	0-20	1.7452	Table5.5	6.195	26.075	1.825	14.2877
	64	Zhang R	2015	Natural grassland in Qingzhen Township	100.186	34.1739	4107	508.8	-3.75	18.9333	0.6763	0-20	0-20	2.87887	Table5.5	5.59	35.345	2.375	14.8821
	65	Unpublished data	2020	Longnan, Gansu, China	104.804	33.4388	1105.33	650	11.65	7.23	0.44	0-20	0-20	0.329525	NA	8.28	5.77	0.9	6.41111
	65	Unpublished data	2020	Longnan, Gansu, China	104.824	33.4334	1124.67	650	11.65	5.66	0.44	0-20	0-20	0.117063	NA	8.31	3.32	0.57	5.82456
	65	Unpublished data	2020	Longnan, Gansu, China	104.809	33.418	1058	650	11.65	7.76	0.44	0-20	0-20	0.112203	NA	8.12	3.63	0.74	4.90541
	1	Yang, L. et al	2020	Wuyishan National Park, Fujian Province, China	117.65	27.725	2130	3319	9.3	14.8	1.91		0-20	1.19707	Fig1	4.81	98.1	6.8	14.4265
Temperate grassland	43	Chen, X. et al.	2020	Hailun State Key Agroecological Experimental Station of the Chinese Academy of Sciences, Hailun, Heilongjiang Province	126.917	47.45	240	550	2.2	31.2125	0.5232	0-20	0-20	2.21518	Fig1	6.08	35.7	2.86	12.4825
	47	Ding, X. et al.	2020	Keshan Farm, in Heilongjiang province of northeastern China	125.267	48.9667	304	525	3.3	34.1	0.5	0-15	0-20	2.00791	Fig1	6.42	35.56	2.85	12.4772
	9	Murugan, R. et al	2019	Central Austrian Alps on Mt. Sonnblick, north of Innsbruck, Austria	12.9733	47.065	1927	1850	1.9	8.5	2.2265	0-15	0-20	10.3874	Table3	4.8	162	6.94333	23.3317
	49	Shao, P. et al.	2018	Duolun County, Inner Mongolia	116.283	42.0333	1324	382.3	2.1	16.95	0.3203	0-10	0-20	1.75346	Table2	7	21.12	1.48	14.2703
	50	Ma, T. et al.	2018	Central part of the Eurasian steppe	112.04	43.56	961	144	3.8	21	0.1565	0-10	0-20	0.13357	Supplementary Data 1	8.63	1.9	0.22	8.63636
	50	Ma, T. et al.	2018	Central part of the Eurasian steppe	109.87	45.25	905	126	3.4	41	0.1418	0-10	0-20	0.188908	Supplementary Data 1	7.63	3.32	0.12	27.6667
	50	Ma, T. et al.	2018	Central part of the Eurasian steppe	111.19	44.08	1147	134	3.3	48	0.147	0-10	0-20	0.247776	Supplementary Data 1	8.1	3.48	0.17	20.4706
	50	Ma, T. et al.	2018	Central part of the Eurasian steppe	109.13	45.8	1092	141	2.1	52	0.1678	0-10	0-20	0.399288	Supplementary Data 1	7.69	5.08	0.26	19.5385
	50	Ma, T. et al.	2018	Central part of the Eurasian steppe	109.62	45.51	987	132	3	42	0.153	0-10	0-20	0.30956	Supplementary Data 1	8.23	4.36	0.21	20.7619
	50	Ma, T. et al.	2018	Central part of the Eurasian steppe	111.83	43.75	960	128	3.8	5	0.1354	0-10	0-20	0.069108	Supplementary Data 1	7.23	1.56	0.05	31.2
	50	Ma, T. et al.	2018	Central part of the Eurasian steppe	110.73	44.5	963	122	4	29	0.1313	0-10	0-20	0.256875	Supplementary Data 1	7.89	4.11	0.29	14.1724
	50	Ma, T. et al.	2018	Central part of the Eurasian steppe	108.48	41.78	1543	204	3.7	38	0.235	0-10	0-20	0.409877	Supplementary Data 1	8.62	5.33	0.59	9.0339
	50	Ma, T. et al.	2018	Central part of the Eurasian steppe	111.94	41.86	1466	226	3.3	64	0.2576	0-10	0-20	1.21735	Supplementary Data 1	8.24	11.97	1.35	8.86667
	50	Ma, T. et al.	2018	Central part of the Eurasian steppe	107.97	46.76	1273	209	-0.18	59	0.2693	0-10	0-20	0.940602	Supplementary Data 1	7.18	11.67	0.91	12.8242
	50	Ma, T. et al.	2018	Central part of the Eurasian steppe	108.29	41.83	1369	183	4.6	36	0.2004	0-10	0-20	0.236715	Supplementary Data 1	8.49	3.67	0.41	8.95122
	50	Ma, T. et al.	2018	Central part of the Eurasian steppe	112.64	42.58	1143	203	4.2	48	0.2204	0-10	0-20	0.34545	Supplementary Data 1	8.57	4.7	0.59	7.9661
	50	Ma, T. et al.	2018	Central part of the Eurasian steppe	112.37	42.2	1302	216	3.8	41	0.24	0-10	0-20	0.202125	Supplementary Data 1	8.45	5.39	0.64	8.42188
	50	Ma, T. et al.	2018	Central part of the Eurasian steppe	114.05	43.85	1065	222	2.3	52	0.3306	0-10	0-20	1.70321	Supplementary Data 1	7.88	16.52	1.37	12.0584
	50	Ma, T. et al.	2018	Central part of the Eurasian steppe	107.52	47.32	1439	243	-2	36	0.3517	0-10	0-20	4.95516	Supplementary Data 1	6.91	41.19	3.58	11.5056
	50	Ma, T. et al.	2018	Central part of the Eurasian steppe	106.22	48.36	1207	261	-1.1	45	0.4206	0-10	0-20	1.81769	Supplementary Data 1	6.65	28.58	2.49	11.4779
	50	Ma, T. et al.	2018	Central part of the Eurasian steppe	116.67	43.55	1270	342	1.1	38	0.3673	0-10	0-20	1.62747	Supplementary Data 1	6.99	22.73	1.93	11.7772
	50	Ma, T. et al.	2018	Central part of the Eurasian steppe	116.78	44.42	1051	306	1.3	10	0.3779	0-10	0-20	1.94719	Supplementary Data 1	6.7	19.26	1.68	11.4643
	50	Ma, T. et al.	2018	Central part of the Eurasian steppe	106.11	48.81	1005	287	-1.13	41	0.4113	0-10	0-20	1.35427	Supplementary Data 1	7.68	16.18	1.47	11.0068
	50	Ma, T. et al.	2018	Central part of the Eurasian steppe	106.72	48.21	1194	245	-0.6	79	0.4383	0-10	0-20	1.43221	Supplementary Data 1	7.08	33.23	2.55	13.0314
	50	Ma, T. et al.	2018	Central part of the Eurasian steppe	117.6	44.44	1079	352	1.1	30	0.3954	0-10	0-20	3.30438	Supplementary Data 1	6.92	34.93	3.09	11.3042
	50	Ma, T. et al.	2018	Central part of the Eurasian steppe	116.56	43.54	1180	331	1.6	55	0.2554	0-10	0-20	3.12682	Supplementary Data 1	6.53	39.58	3.96	9.99495
	50	Ma, T. et al.	2018	Central part of the Eurasian steppe	106.18	48.9	870	279	-0.9	54	0.3638	0-10	0-20	1.90457	Supplementary Data 1	7.42	19.86	1.86	10.6774
	50	Ma, T. et al.	2018	Central part of the Eurasian steppe	117.41	44.46	1128	346	0.8	45	0.4352	0-10	0-20	3.76273	Supplementary Data 1	7.14	48.74	4.39	11.1025
	50	Ma, T. et al.	2018	Central part of the Eurasian steppe	106.5	48.86	883	268	-0.7	43	0.3488	0-10	0-20	2.12925	Supplementary Data 1	7.35	21.04	2.08	10.1154
	50	Ma, T. et al.	2018	Central part of the Eurasian steppe	119.67	49.53	719	374	-1.7	21	0.5144	0-10	0-20	0.566056	Supplementary Data 1	8.32	13.84	1.6	8.65
	50	Ma, T. et al.	2018	Central part of the Eurasian steppe	120.42	49.13	706	404	-1.5	58	0.5557	0-10	0-20	1.24168	Supplementary Data 1	6.52	18.26	1.45	12.5931
	50	Ma, T. et al.	2018	Central part of the Eurasian steppe	106.07	49.16	925	307	-1.3	11.5	0.4068	0-10	0-20	1.7609	Supplementary Data 1	6.54	34.06	2.91	11.7045
	50	Ma, T. et al.	2018	Central part of the Eurasian steppe	105.94	49.37	823	313	-1	37	0.4093	0-10	0-20	0.766776	Supplementary Data 1	8.24	14.86	1.82	8.16484
	50	Ma, T. et al.	2018	Central part of the Eurasian steppe	106.31	49.94	739	321	-0.9	37	0.4326	0-10	0-20	1.45411	Supplementary Data 1	8.12	14.44	1.58	9.13924
	50	Ma, T. et al.	2018	Central part of the Eurasian steppe	111.55	40.95	1692	357	-1	64	0.426	0-10	0-20	0.539856	Supplementary Data 1	7.92	6.52	0.68	9.58824
	50	Ma, T. et al.	2018	Central part of the Eurasian steppe	120.03	49.38	640	374	-1.1	36	0.506	0-10	0-20	1.53466	Supplementary Data 1	7.54	19.65	1.58	12.4367
	50	Ma, T. et al.	2018	Central part of the Eurasian steppe	120.02	49.52	817	358	-0.8	42	0.5722	0-10	0-20	1.61747	Supplementary Data 1	7.49	15.92	1.7	9.36471
	50	Ma, T. et al.	2018	Central part of the Eurasian steppe	119.762	48.8584	657	404	-2.43	36	0.4786	0-10	0-20	1.1734	Supplementary Data 1	7.12	16.55	1.37	12.0803
	52	Zhu, X. et al.	2018	University of Illinois Energy Farm, Urbana, IL, USA	-88.19	40.06	220	1042	11.1	32.7667	0.8432	0-10	0-20	1.59546	Table1	6.1	16.23	2.58	6.2907
	52	Zhu, X. et al.	2018	University of Illinois Energy Farm, Urbana, IL, USA	-88.19	40.06	220	1042	11.1	32.7667	0.8432	0-10	0-20	1.78621	Table1	6.1	19.14	2.58	7.4186
	52	Zhu, X. et al.	2018	University of Illinois Energy Farm, Urbana, IL, USA	-88.19	40.06	220	1042	11.1	32.7667	0.8432	0-10	0-20	1.86138	Table1	6.1	19.23	2.58	7.45349
	54	Liang, C. et al.	2016	Wisconsin Integrated Cropping System Trial (WICST), located at the University of Wisconsin's Agricultural Research Station near Arlington, Wisconsin	-89.3797	43.2957	312	869	6.8	28.2	0.79	0-15	0-20	1.1552	Fig3	6.75	21.745	2.13	10.2089
	54	Liang, C. et al.	2016	Wisconsin Integrated Cropping System Trial (WICST), located at the University of Wisconsin's Agricultural Research Station near Arlington, Wisconsin	-89.3797	43.2957	312	869	6.8	28	0.79	0-15	0-20	1.95076	Fig3	6.77	44.84	2.135	21.0023
	17	Khan, K. S. et al	2016	Göttingen, Germany	9.93333	51.5333	143	725	8.8	63.8	0.8761	0-10	0-20	0.7292	Supplementary Tables 1–6	4.78	11.8	0.95	12.4211
	17	Khan, K. S. et al	2016	Göttingen, Germany	9.93333	51.5333	143	725	8.8	7.6	0.8761	0-10	0-20	1.8532	Supplementary Tables 1–6	5.98	18.2	1.59	11.4465
	17	Khan, K. S. et al	2016	Heringen, Germany	9.98333	50.8833	228	735	8.2	54	0.8115	0-10	0-20	1.3441	Supplementary Tables 1–6	5.22	45.4	3.58	12.6816
	17	Khan, K. S. et al	2016	Witzenhausen, Germany	9.86667	51.3167	166	630	8.5	20.2	0.8273	0-10	0-20	4.2718	Supplementary Tables 1–6	4.89	54.8	4.56	12.0175
	17	Khan, K. S. et al	2016	Witzenhausen, Germany	9.86667	51.3167	166	630	8.5	5.9	0.8273	0-10	0-20	2.4553	Supplementary Tables 1–6	5.51	31.3	2.71	11.5498
	17	Khan, K. S. et al	2016	Dohrstadt, Germany	9.95	48.4667	587	836	7.73	10.1	0.8303	0-10	0-20	1.8088	Supplementary Tables 1–6	7.77	34.9	2.68	13.0224
	17	Khan, K. S. et al	2016	Dohrstadt, Germany	9.95	48.4667	587	836	7.73	10.1	0.8303	0-10	0-20	2.2596	Supplementary Tables 1–6	7.49	45.4	3.64	12.4725
	17	Khan, K. S. et al	2016	Dohrstadt, Germany	9.95	48.4667	587	836	7.73	10.1	0.8303	0-10	0-20	1.8432	Supplementary Tables 1–6	7.53	35.5	3.16	11.2342
	17	Khan, K. S. et al	2016	Dohrstadt, Germany	9.95	48.4667	587	836	7.73	10.1	0.8303	0-10	0-20	1.9726	Supplementary Tables 1–6	7.58	38.4	3.39	11.3274
	17	Khan, K. S. et al	2016	Dohrstadt, Germany	9.95	48.4667	587	836	7.73	16.4	0.8303	0-10	0-20	1.8979	Supplementary Tables 1–6	7.61	33.6	2.99	11.2375
	17	Khan, K. S. et al	2016	Nordenham, Germany	8.48333	53.4833	4	731	9.16	10.1	1.1318	0-10	0-20	9.6679	Supplementary Tables 1–6	4.41	106.8	9.71	10.999
	17	Khan, K. S. et al	2016	Nordenham, Germany	8.48333	53.4833	4	731	9.16	11.1	1.1318	0-10	0-20	9.7108	Supplementary Tables 1–6	4.89	92.6	8.67	10.6805
	17	Khan, K. S. et al	2016	Nordenham, Germany	8.48333	53.4833	4	731	9.16	10.8	1.1318	0-10	0-20	10.5981	Supplementary Tables 1–6	4.79	121.7	11.05	11.0136
	17	Khan, K. S. et al	2016	Nordenham, Germany	8.48333	53.4833	4	731	9.16	17	1.1318	0-10	0-20	4.9875	Supplementary Tables 1–6	5.45	55.9	5.11	10.9393
	17	Khan, K. S. et al	2016	Nordenham, Germany	8.48333	53.4833	4	731	9.16	36.1	1.1318	0-10	0-20	2.3888	Supplementary Tables 1–6	5.1	22.5	2.4	9.375
	17	Khan, K. S. et al	2016	Nordenham, Germany	8.48333	53.4833	4	731	9.16	22.7	1.1318	0-10	0-20	1.5284	Supplementary Tables 1–6	5.28	44.9	4.59	9.78214
	17	Khan, K. S. et al	2016	Göttingen, Germany	9.93333	51.5333	143	725	8.8	14.1	0.8761	0-10	0-20	2.041	Supplementary Tables 1–6	7.48	31.4	2.86	10.979
	17	Khan, K. S. et al	2016	Göttingen, Germany	9.93333	51.5333	143	725	8.8	4.2	0.8761	0-10	0-20	3.5506	Supplementary Tables 1–6	7.9	63.3	5.59	11.3238
	17	Khan, K. S. et al	2016	Göttingen, Germany	9.93333	51.5333	143	725	8.8	7.7	0.8761	0-10	0-20	1.648	Supplementary Tables 1–6	7.93	21.2	1.94	10.9278
	17	Khan, K. S. et al	2016	Göttingen, Germany	9.93333	51.5333	143	725	8.8	5.9	0.8761	0-10	0-20	3.974	Supplementary Tables 1–6	7.51	52.4	4.65	11.2688
	56	Ding, X. et al.	2013	Hailun National Field Station, Chinese Academy of Sciences, in Heilongjiang province, China	126.633	47.4333	158	550	1.5	40.8	0.4884	0-20	0-20	1.95887	Fig1	6.21	31.9	2.76	11.558
	57	Liang, C. & Balser, T. C.	2013	Wisconsin, USA	-88.0667	42.6833	414	870	8.21	18.2	0.821	0-10	0-20	0.5522	Fig1	6.41	14.9	1.4	10.6429
	57	Liang, C. & Balser, T. C.	2013	Wisconsin, USA	-88.0667	42.6833	414	870	8.21	17.2	0.821	0-10	0-20	0.538	Fig1	6.6	20.3	1.9	10.6842
	59	Wichern, J. et al	2006	Flood plain of the river Werra close to Heringen in North Hessia, Germany	9.98333	50.3833	230	690	6.7	8	1.4899	0-10	0-20	1.522	Table2	4.67	16.8	1.4	12	Appuhn et al. (2004)
	59	Wichern, J. et al	2006	Flood plain of the river Werra close to Heringen in North Hessia, Germany	9.98333	50.3833	230	690	6.7	13	1.4899	0-10	0-20	1.834	Table2	5.35	36.2	2.7	13.4074	Appuhn et al. (2004)
	60	Appuhn, A. et al.	2004	Northwest ofKassel, north Hessia, Germany	11.1131	51.3589	140	686	9	17	0.6513	0-10	0-20	0.894	Table1	6.9	16.3	1.7	9.58824	Appuhn et al. (2004)
	61	Amelung, W. et al	2001	Minnesota, USA	-94	44.15	539	620	3	26.3	0.69	0-5	0-20	4.06	Table1	6.1	63.9	4.96	12.8831
	61	Amelung, W. et al	2001	Minnesota, USA	-94	44.15	539	620	3	20	0.69	0-5	0-20	1.96	Table1	5.8	33.8	2.93	11.5358
	61	Amelung, W. et al	2001	North Dakota, USA	-96.48	46.53	299	390	5	20	0.5029	0-5	0-20	2.32	Table1	6	50.7	4.39	11.549
	61	Amelung, W. et al	2001	North Dakota, USA	-96.48	46.53	299	390	5	22.6	0.5029	0-5	0-20	0.38	Table1	5.4	26.9	3.05	8.81967
	61	Amelung, W. et al	2001	North Dakota, USA	-96.48	46.53	299	490	5	29	0.5029	0-5	0-20	6.48	Table1	6.5	95.5	8.38	11.3962
	61	Amelung, W. et al	2001	North Dakota, USA	-96.48	46.53	299	490	5	24.5	0.5029	0-5	0-20	2.51	Table1	7.3	37.3	3.8	9.81579
	61	Amelung, W. et al	2001	Minnesota, USA	-94	44.15	304	720	7	25.2	0.69	0-5	0-20	3.13	Table1	7.21	49.7	4.06	12.2414
	61	Amelung, W. et al	2001	Minnesota, USA	-94	44.15	304	720	7	15.3	0.69	0-5	0-20	2.5	Table1	7.4	50.9	3.78	13.4656
	61	Amelung, W. et al	2001	Iowa, USA	-92.01	41.56	253	840	10	30	0.7445	0-5	0-20	3.7	Table1	6.1	56.5	4.75	11.8947
	61	Amelung, W. et al	2001	Iowa, USA	-92.01	41.56	253	840	10	31	0.7445	0-5	0-20	1.87	Table1	6.9	35.6	2.86	12.4476
	61	Amelung, W. et al	2001	Nebraska, USA	-100	41.5	917	720	11	22	0.3912	0-5	0-20	7.95	Table1	5.5	99.1	9.51	10.4206
	61	Amelung, W. et al	2001	Nebraska, USA	-100	41.5	917	720	11	33	0.3912	0-5	0-20	1.54	Table1	5	23.9	2.18	10.9633
	34	Zhang, X. et al	1999	Lincoln, NE, USA	96.6667	40.8	140	792	10.9	32.3	0.0347	0-10	0-20	1.67925	Table2	5.6	40.49	3.46	11.7023
	62	Amelung, W. et al	1999	CutKnife-Naicam, North American	-105.783	52.8667	563	456	0.9	29.1	0.4595	0-10	0-20	4.55124	Table1	7.4	58.2	5.29	11.0019
	62	Amelung, W. et al	1999	Elstow, North American	-106.283	52.3167	625	343	1.6	16.2	0.4174	0-10	0-20	4.03542	Table1	7.2	42.3	4.23	10
	62	Amelung, W. et al	1999	Ardill, North American	-107.783	50.2833	602	380	3.2	22.2	0.3381	0-10	0-20	4.20885	Table1	5.6	42.3	3.89	10.874
	62	Amelung, W. et al	1999	Svea, North American	-95.9167	45.5833	449	565	6.1	34.4	0.5649	0-10	0-20	6.9184	Table1	5.9	64	5.34	11.985
	62	Amelung, W. et al	1999	Amor, North American	-100.883	46.8167	647	419	5	20.6	0.3465	0-10	0-20	3.3654	Table1	5.9	31.6	3.31	9.54683
	62	Amelung, W. et al	1999	Joplin, North American	-109.683	48.5333	905	300	6.1	16.5	0.2311	0-10	0-20	1.84172	Table1	6.1	16.4	1.65	9.93939
	62	Amelung, W. et al	1999	Ulm, North American	-106.117	44.65	1063	400	7.2	23.8	0.2384	0-10	0-20	1.92955	Table1	5.4	18.5	1.94	9.53608
	62	Amelung, W. et al	1999	Weld, North American	-103.2	40.15	1601	375	10.8	17.7	0.2267	0-10	0-20	2.07194	Table1	6.7	16.9	1.59	10.6289
	62	Amelung, W. et al	1999	Holdrege, North American	-99.3667	40.4333	848	666	11.6	24.4	0.4171	0-10	0-20	3.69564	Table1	6.2	29.9	3.02	9.90066
	62	Amelung, W. et al	1999	Sharpsburg, North American	-96.6833	40.3167	422	792	10.9	32.3	0.5389	0-10	0-20	4.99365	Table1	5.6	40.5	3.46	11.7052
	63	Zhou, T. et al.	2019	An apple orchard in Shenyang Agricultural University,China	123.933	42.3833	55	364.7	18.1	24	0.54	0-10	0-20	2.13555	Table2	6.3	86	5.6	15.3571
	63	Zhou, T. et al.	2019	An apple orchard in Shenyang Agricultural University,China	123.933	42.3833	55	364.7	18.1	24	0.54	0-10	0-20	1.61205	Table2	6.3	86	5.6	15.3571
	63	Zhou, T. et al.	2019	An apple orchard in Shenyang Agricultural University,China	123.933	42.3833	55	364.7	18.1	24	0.54	0-10	0-20	1.77631	Table2	6.3	86	5.6	15.3571
a: Reference listed in Supplementary References.
b: Ratio of precipitation to potential evapotranspiration, obtained from Global Aridity and PET Database; http://www.cgiar-csi.org/data/global-aridity-and-pet-database.
The red number represents the data obtained from the global high-resolution (250-m) gridded soil properties database; http://data.isric.org.
SOC: soil organic carbon; N: nitrogen
